# Supplementary material for: Are Iron-Phosphate Minerals a Sink for Phosphorus in Anoxic Black Sea Sediments?
Source: PubMed Central journal article supplement (PMC4079231; doi:10.1371/journal.pone.0101139), 2014-07-02
Supplement: pone.0101139.s001.pdf [file pone.0101139.s001.pdf]

**Dataset S1: Pore water data**

| Station | Core     | Sediment depth<br>average (cm) | Fe 2+<br>µmol/L | Mn 2+<br>µmol/L | SO4 2-<br>mmol/L | PO 4<br>µmol/L | H2S*<br>µmol/L | Core                                 | Sediment depth<br>average | NH4+<br>mmol/L | Alk<br>mEq/L |
|---------|----------|--------------------------------|-----------------|-----------------|------------------|----------------|----------------|--------------------------------------|---------------------------|----------------|--------------|
| 10      | MC-10-04 | -1.00                          | 0.31            | 6.15            | 18.34            | 6.45           |                | MC-10-05                             | 0.00                      |                | 3.42         |
| 10      | MC-10-04 | -1.00                          | 0.31            | 6.09            | 18.08            | 6.38           |                | MC-10-05                             | 2.50                      | 0.10           | 3.89         |
| 10      | MC-10-04 | Mean bottom water              | 0.31            | 6.12            | 18.21            | 6.41           | 182.30         | MC-10-05                             | 4.50                      | 0.11           | 3.97         |
| 10      | MC-10-04 | 0.90                           | 0.55            | 5.48            | 17.51            | 8.59           | 201.81         | MC-10-05                             | 6.50                      | 0.13           | 4.41         |
| 10      | MC-10-04 | 1.50                           |                 |                 |                  |                | 193.56         |                                      |                           |                |              |
| 10      | MC-10-04 | 2.50                           | 0.73            | 5.53            | 17.49            | 8.36           | 186.80         | MC-10-05                             | 8.50                      | 0.14           | 4.52         |
| 10      | MC-10-04 | 3.50                           | 0.30            | 5.07            | 17.13            | 11.21          | 333.84         | MC-10-05                             | 10.50                     | 0.10           | 4.66         |
| 10      | MC-10-04 | 5.50                           | 0.62            | 5.02            | 17.27            | 11.76          | 351.85         | MC-10-05                             | 12.50                     | 0.14           | 4.66         |
| 10      | MC-10-04 | 7.50                           | 0.79            | 4.74            | 16.88            | 12.43          | 363.10         | MC-10-05                             | 16.50                     | 0.18           | 5.30         |
| 10      | MC-10-04 | 9.50                           | 0.36            | 4.70            | 17.16            | 13.80          | 422.37         | MC-10-05                             | 20.50                     | 0.22           | 6.14         |
| 10      | MC-10-04 | 13.50                          |                 |                 |                  |                | 479.39         |                                      |                           |                |              |
| 10      | MC-10-04 | 15.50                          | 0.33            | 4.35            | 16.49            | 14.64          |                | MC-10-05                             | 34.50                     | 0.28           | 7.57         |
| 10      | MC-10-04 | 17.50                          | 0.29            | 3.99            | 16.05            | 16.36          | 591.92         | MC-10-05                             | 48.50                     | 0.35           | 9.30         |
| 10      | MC-10-04 | 21.50                          | 0.53            | 3.73            | 15.82            | 17.58          | 746.46         |                                      |                           |                |              |
| 10      | MC-10-04 | 28.50                          | 0.32            | 3.29            | 15.59            | 21.42          | 967.78         |                                      |                           |                |              |
| 10      | MC-10-04 | 34.50                          | 1.80            | 2.93            | 15.01            | 23.94          | 937.77         |                                      |                           |                |              |
| 10      | MC-10-04 | 46.50                          |                 |                 |                  |                | 1455.41        |                                      |                           |                |              |
| 8       | MC-08-02 | -1.00                          | 0.11            | 4.35            | 17.06            | 6.14           |                | *other core from the same deployment |                           |                |              |
| 8       | MC-08-02 | 0.50                           | 0.19            | 4.25            | 16.97            | 7.54           |                |                                      |                           |                |              |
| 8       | MC-08-02 | 1.50                           | 0.11            | 4.41            | 17.22            | 9.49           |                |                                      |                           |                |              |
| 8       | MC-08-02 | 2.50                           | 0.20            | 3.95            | 16.95            | 10.17          |                |                                      |                           |                |              |
| 8       | MC-08-02 | 3.50                           | 0.27            | 3.89            | 17.08            | 10.76          |                |                                      |                           |                |              |
| 8       | MC-08-02 | 4.50                           | 0.17            | 3.85            | 16.95            | 11.19          |                |                                      |                           |                |              |
| 8       | MC-08-02 | 6.50                           | 0.08            | 3.73            | 16.79            | 11.67          |                |                                      |                           |                |              |
| 8       | MC-08-02 | 8.50                           | 0.08            | 3.67            | 16.42            | 11.80          |                |                                      |                           |                |              |
| 8       | MC-08-02 | 10.50                          | 0.12            | 3.64            | 16.82            | 12.77          |                |                                      |                           |                |              |
| 8       | MC-08-02 | 12.50                          | 0.12            | 3.44            | 16.40            | 13.36          |                |                                      |                           |                |              |
| 8       | MC-08-02 | 14.50                          | 0.08            | 3.37            | 16.04            | 13.32          |                |                                      |                           |                |              |
| 8       | MC-08-02 | 20.50                          | 0.07            | 3.14            | 15.61            | 14.65          |                |                                      |                           |                |              |
| 8       | MC-08-02 | 26.50                          | 0.09            | 3.00            | 15.91            | 16.57          |                |                                      |                           |                |              |
| 8       | MC-08-02 | 34.50                          | 0.05            | 2.64            | 14.97            | 17.34          |                |                                      |                           |                |              |
| 8       | MC-08-02 | 44.50                          | 0.07            | 2.35            | 14.40            | 19.07          |                |                                      |                           |                |              |
| 5       | MC-05-14 | 0.50                           | 0.48            | 4.89            | 20.83            | 11.60          | 313.86         | MC-05-03                             | 0.00                      | 0.12           | 3.95         |
| 5       | MC-05-14 | 1.50                           |                 |                 |                  |                |                | MC-05-03                             | 0.50                      | 0.12           | 3.87         |
| 5       | MC-05-14 | 2.50                           |                 |                 |                  |                |                | MC-05-03                             | 2.50                      | 0.12           | 3.80         |
| 5       | MC-05-14 | 3.50                           |                 |                 |                  |                |                | MC-05-03                             | 4.50                      | 0.11           | 3.85         |
| 5       | MC-05-14 | 4.50                           | 0.26            | 4.15            | 18.03            | 10.77          | 326.88         | MC-05-03                             | 9.50                      | 0.12           | 4.34         |
| 5       | MC-05-14 | 5.50                           |                 |                 |                  |                |                | MC-05-03                             | 13.50                     | 0.13           | 4.21         |
| 5       | MC-05-14 | 7.50                           |                 |                 |                  |                |                | MC-05-03                             | 19.50                     | 0.13           | 4.71         |
| 5       | MC-05-14 | 8.50                           | 0.13            | 4.35            | 18.86            | 11.94          | 342.61         | MC-05-03                             | 25.50                     | 0.17           | 4.76         |
| 5       | MC-05-14 | 12.50                          |                 |                 |                  |                | 377.70         | MC-05-03                             | 29.50                     | 0.16           | 4.71         |
| 5       | MC-05-14 | 16.50                          |                 |                 |                  |                | 377.36         | MC-05-03                             | 37.50                     |                | 4.98         |
| 5       | MC-05-14 | 20.50                          |                 |                 |                  |                | 318.84         |                                      |                           |                |              |
| 5       | MC-05-14 | 24.50                          |                 |                 |                  |                | 346.78         |                                      |                           |                |              |
| 5       | MC-05-14 | 28.50                          |                 |                 |                  |                | 356.42         |                                      |                           |                |              |
| 5       | MC-05-14 | 32.50                          |                 |                 |                  |                | 357.18         |                                      |                           |                |              |
| 5       | MC-05-14 | 38.00                          |                 |                 |                  |                | 248.51         |                                      |                           |                |              |
| 5       | MC-05-14 | 46.00                          |                 |                 |                  |                | 344.16         |                                      |                           |                |              |
