# Supplementary material for: Are Iron-Phosphate Minerals a Sink for Phosphorus in Anoxic Black Sea Sediments?
Source: PubMed Central journal article supplement (PMC4079231; doi:10.1371/journal.pone.0101139), 2014-07-02
Supplement: pone.0101139.s002.pdf [file pone.0101139.s002.pdf]

|      |      |    |    |       |       |       |      |       |      |      |      |      |       |        |        |
|------|------|----|----|-------|-------|-------|------|-------|------|------|------|------|-------|--------|--------|
| 7617 | 7617 | 31 | 32 | 31.50 | 19.18 | 47.16 | 0.05 | 4.47  | 1.01 | 2.86 | 1.54 | 0.54 | 0.004 | 0.0014 | 194.18 |
| 7617 | 7617 | 32 | 33 | 32.50 | 19.87 | 43.83 | 0.06 | 4.42  | 1.07 | 3.19 | 1.70 | 0.53 | 0.004 | 0.0013 | 185.13 |
| 7617 | 7617 | 33 | 34 | 33.50 | 19.57 | 40.54 | 0.05 | 5.35  | 1.20 | 3.04 | 1.63 | 0.54 | 0.005 | 0.0016 | 227.48 |
| 7617 | 7617 | 34 | 35 | 34.50 | 18.92 | 41.70 | 0.05 | 4.88  | 1.07 | 2.88 | 1.56 | 0.54 | 0.005 | 0.0016 | 214.88 |
| 7620 | 7620 | 0  | 1  | 0.50  | 16.91 | 31.92 | 0.02 | 4.77  | 1.80 | 1.11 | 1.00 | 0.90 | 0.002 | 0.0014 | 235.10 |
| 7620 | 7620 | 1  | 2  | 1.50  | 19.86 | 27.36 | 0.03 | 5.98  | 2.33 | 2.11 | 1.83 | 0.87 | 0.003 | 0.0013 | 250.80 |
| 7620 | 7620 | 2  | 3  | 2.50  | 19.91 | 37.05 | 0.04 | 5.01  | 2.18 | 2.61 | 2.16 | 0.83 | 0.003 | 0.0010 | 209.39 |
| 7620 | 7620 | 3  | 4  | 3.50  | 17.75 | 50.56 | 0.04 | 3.92  | 1.84 | 2.27 | 1.90 | 0.84 | 0.002 | 0.0009 | 183.74 |
| 7620 | 7620 | 4  | 5  | 4.50  | 18.98 | 50.58 | 0.04 | 3.99  | 1.96 | 2.46 | 2.09 | 0.85 | 0.002 | 0.0009 | 175.15 |
| 7620 | 7620 | 5  | 6  | 5.50  | 20.72 | 44.80 | 0.05 | 4.39  | 2.40 | 2.77 | 2.50 | 0.90 | 0.003 | 0.0010 | 176.38 |
| 7620 | 7620 | 6  | 7  | 6.50  | 20.18 | 57.27 | 0.04 | 4.03  | 2.13 | 2.39 | 2.19 | 0.92 | 0.002 | 0.0010 | 166.30 |
| 7620 | 7620 | 7  | 8  | 7.50  | 18.45 | 58.59 | 0.04 | 4.52  | 2.11 | 2.07 | 2.05 | 0.99 | 0.003 | 0.0012 | 204.00 |
| 7620 | 7620 | 8  | 9  | 8.50  | 20.79 | 53.18 | 0.05 | 5.77  | 2.68 | 2.59 | 2.60 | 1.00 | 0.003 | 0.0013 | 231.14 |
| 7620 | 7620 | 9  | 10 | 9.50  | 25.12 | 63.98 | 0.04 | 4.27  | 1.77 | 1.67 | 1.66 | 1.00 | 0.002 | 0.0014 | 141.52 |
| 7620 | 7620 | 10 | 11 | 10.50 | 16.77 | 76.86 | 0.03 | 3.37  | 1.14 | 0.93 | 0.95 | 1.02 | 0.002 | 0.0016 | 167.36 |
| 7620 | 7620 | 11 | 12 | 11.50 | 18.59 | 92.65 | 0.03 | 3.07  | 1.25 | 0.97 | 1.01 | 1.04 | 0.002 | 0.0016 | 137.33 |
| 7620 | 7620 | 12 | 13 | 12.50 | 16.99 | 84.28 | 0.03 | 3.34  | 1.19 | 1.01 | 1.01 | 1.00 | 0.002 | 0.0016 | 163.69 |
| 7620 | 7620 | 13 | 14 | 13.50 | 21.83 | 59.68 | 0.04 | 4.98  | 2.35 | 2.09 | 2.22 | 1.06 | 0.003 | 0.0015 | 189.92 |
| 7620 | 7620 | 14 | 15 | 14.50 | 19.22 | 68.63 | 0.04 | 4.53  | 1.85 | 1.63 | 1.72 | 1.06 | 0.003 | 0.0017 | 196.29 |
| 7620 | 7620 | 15 | 16 | 15.50 | 17.80 | 73.54 | 0.04 | 4.64  | 1.80 | 1.67 | 1.69 | 1.01 | 0.003 | 0.0016 | 217.22 |
| 7620 | 7620 | 16 | 17 | 16.50 | 21.22 | 53.53 | 0.04 | 4.80  | 2.35 | 2.32 | 2.44 | 1.05 | 0.004 | 0.0016 | 188.31 |
| 7620 | 7620 | 17 | 18 | 17.50 | 16.24 | 66.88 | 0.04 | 4.08  | 1.85 | 1.67 | 1.77 | 1.06 | 0.003 | 0.0019 | 209.34 |
| 7620 | 7620 | 18 | 19 | 18.50 | 18.58 | 71.50 | 0.03 | 4.22  | 1.69 | 1.51 | 1.55 | 1.03 | 0.003 | 0.0022 | 189.25 |
| 7620 | 7620 | 19 | 20 | 19.50 | 16.42 | 81.50 | 0.03 | 3.51  | 1.16 | 1.02 | 1.03 | 1.01 | 0.002 | 0.0024 | 177.89 |
| 7620 | 7620 | 20 | 21 | 20.50 | 17.96 | 68.83 | 0.03 | 3.39  | 1.49 | 1.33 | 1.34 | 1.01 | 0.003 | 0.0025 | 157.33 |
| 7620 | 7620 | 21 | 22 | 21.50 | 18.22 | 69.75 | 0.03 | 4.74  | 1.94 | 1.52 | 1.78 | 1.17 | 0.004 | 0.0028 | 216.51 |
| 7620 | 7620 | 22 | 23 | 22.50 | 19.26 | 74.70 | 0.03 | 3.64  | 1.80 | 1.62 | 1.74 | 1.07 | 0.004 | 0.0027 | 157.35 |
| 7620 | 7620 | 23 | 24 | 23.50 | 20.80 | 63.87 | 0.04 | 4.99  | 2.39 | 1.89 | 2.22 | 1.18 | 0.005 | 0.0028 | 199.58 |
| 7620 | 7620 | 24 | 25 | 24.50 | 17.80 | 93.37 | 0.03 | 3.38  | 1.26 | 1.13 | 1.14 | 1.01 | 0.003 | 0.0023 | 157.94 |
| 7620 | 7620 | 25 | 26 | 25.50 | 19.50 | 50.56 | 0.04 | 5.34  | 2.83 | 2.95 | 2.95 | 1.00 | 0.005 | 0.0018 | 227.97 |
| 7620 | 7620 | 26 | 27 | 26.50 | 22.13 | 40.70 | 0.05 | 6.54  | 3.25 | 3.83 | 3.50 | 0.91 | 0.007 | 0.0017 | 246.11 |
| 7620 | 7620 | 27 | 28 | 27.50 | 27.07 | 12.62 | 0.06 | 7.55  | 4.27 | 5.47 | 5.05 | 0.92 | 0.008 | 0.0015 | 232.21 |
| 7620 | 7620 | 28 | 29 | 28.50 | 32.78 | 14.31 | 0.05 | 7.69  | 4.34 | 5.44 | 5.07 | 0.93 | 0.008 | 0.0015 | 195.26 |
| 7620 | 7620 | 29 | 30 | 29.50 | 26.15 | 49.14 | 0.03 | 6.37  | 2.83 | 2.74 | 2.87 | 1.05 | 0.006 | 0.0020 | 202.67 |
| 7620 | 7620 | 30 | 31 | 30.50 | 27.47 | 18.58 | 0.03 | 10.89 | 4.25 | 4.24 | 4.48 | 1.06 | 0.010 | 0.0022 | 330.16 |
| 7620 | 7620 | 31 | 32 | 31.50 | 27.14 | 14.92 | 0.03 | 12.48 | 2.56 | 4.36 | 2.98 | 0.68 | 0.009 | 0.0022 | 382.86 |
| 7620 | 7620 | 32 | 33 | 32.50 | 26.35 | 13.17 | 0.03 | 12.56 | 1.86 | 4.49 | 2.48 | 0.55 | 0.009 | 0.0020 | 396.81 |
