# Supplementary material for: Are Iron-Phosphate Minerals a Sink for Phosphorus in Anoxic Black Sea Sediments?
Source: PubMed Central journal article supplement (PMC4079231; doi:10.1371/journal.pone.0101139), 2014-07-02
Supplement: pone.0101139.s003.pdf [file pone.0101139.s003.pdf]

**Dataset S3: Solid phase phosphorus fractions**

| Station | Core     | Sediment depth  |                    |                     | ex-P<br>μmol/g | Fe-P<br>μmol/g | authi-P<br>μmol/g | det-P<br>μmol/g | org-P<br>μmol/g |
|---------|----------|-----------------|--------------------|---------------------|----------------|----------------|-------------------|-----------------|-----------------|
|         |          | <i>top (cm)</i> | <i>bottom (cm)</i> | <i>average (cm)</i> |                |                |                   |                 |                 |
| 10      | MC-10-05 | 2               | 3                  | 2.5                 | 0.57           | 3.41           | 4.09              | 1.82            | 5.40            |
| 10      | MC-10-05 | 7               | 9                  | 8                   | 0.77           | 3.99           | 5.64              | 2.56            | 5.06            |
| 10      | MC-10-05 | 13              | 15                 | 14                  | 0.90           | 3.41           | 5.36              | 1.74            | 5.06            |
| 10      | MC-10-05 | 21              | 24                 | 22.5                | 1.17           | 4.07           | 5.30              | 2.27            | 5.40            |
| 10      | MC-10-05 | 30              | 33                 | 31.5                | 0.89           | 3.46           | 6.35              | 2.55            | 5.38            |
| 10      | MC-10-05 | 42              | 45                 | 43.5                | 1.03           | 4.27           | 5.56              | 3.05            | 4.94            |
| 8       | MC-08-02 | 1               | 2                  | 1.5                 | 1.19           | 4.57           | 2.79              | 1.34            | 5.78            |
| 8       | MC-08-02 | 15              | 17                 | 16                  | 0.83           | 3.28           | 5.28              | 2.36            | 5.58            |
| 8       | MC-08-02 | 33              | 36                 | 34.5                | 1.04           | 3.48           | 5.81              | 2.47            | 4.32            |
| 5       | MC-05-14 | 0               | 1                  | 0.5                 | 2.33           | 6.12           | 2.01              | 1.27            | 10.47           |
| 5       | MC-05-14 | 1               | 2                  | 1.5                 | 1.74           | 5.84           | 3.14              | 1.29            | 11.12           |
| 5       | MC-05-14 | 2               | 3                  | 2.5                 | 1.24           | 4.45           | 2.98              | 2.00            | 10.48           |
| 5       | MC-05-14 | 3               | 4                  | 3.5                 | 1.14           | 4.79           | 3.01              | 1.88            | 6.21            |
| 5       | MC-05-14 | 5               | 6                  | 5.5                 | 1.76           | 4.88           | 3.54              | 1.43            | 7.31            |
| 5       | MC-05-14 | 7               | 8                  | 7.5                 | 1.46           | 5.78           | 2.67              | 1.47            | 5.73            |
| 5       | MC-05-14 | 10              | 11                 | 10.5                | 2.05           | 6.88           | 2.80              | 0.79            | 4.32            |
| 5       | MC-05-14 | 13              | 14                 | 13.5                | 1.32           | 6.18           | 3.77              | 1.28            | 6.12            |
| 5       | MC-05-14 | 16              | 17                 | 16.5                | 1.32           | 5.59           | 7.61              | 1.33            | 5.55            |
| 5       | MC-05-14 | 19              | 20                 | 19.5                | 1.68           | 6.06           | 3.11              | 1.22            | 4.57            |
| 5       | MC-05-14 | 22              | 23                 | 22.5                | 1.72           | 6.42           | 4.37              | 1.27            | 5.01            |
| 5       | MC-05-14 | 25              | 26                 | 25.5                | 1.60           | 6.30           | 3.27              | 1.11            | 2.74            |
| 5       | MC-05-14 | 26              | 27                 | 26.5                | 0.33           | 1.32           | 8.13              | 1.93            | 3.05            |
| 5       | MC-05-14 | 29              | 30                 | 29.5                | 0.38           | 1.52           | 7.34              | 1.89            | 4.74            |
| 5       | MC-05-14 | 32              | 33                 | 32.5                | 0.36           | 1.53           | 7.38              | 2.40            | 3.33            |
| 5       | MC-05-14 | 33              | 34                 | 33.5                | 0.41           | 1.85           | 8.89              | 2.48            | 3.85            |
| 5       | MC-05-14 | 34              | 35                 | 34.5                | 1.06           | 4.09           | 9.12              | 1.99            | 7.92            |
| 7614    | 7614-1   | 0               | 1                  | 0.5                 | 0.97           | 24.30          | 2.12              | 0.84            | 0.00            |
| 7614    | 7614-1   | 1               | 2                  | 1.5                 | 1.16           | 22.99          | 1.82              | 1.39            | 4.45            |
| 7614    | 7614-1   | 3               | 4                  | 3.5                 | 0.96           | 13.91          | 2.21              | 1.73            | 6.51            |
| 7614    | 7614-1   | 6               | 7                  | 6.5                 | 1.17           | 13.86          | 3.01              | 1.86            | 8.29            |
| 7614    | 7614-1   | 10              | 11                 | 10.5                | 1.06           | 11.95          | 2.26              | 1.43            | 9.33            |
| 7614    | 7614-1   | 14              | 15                 | 14.5                | 0.48           | 8.93           | 2.25              | 1.31            | 6.41            |
| 7617    | 7617     | 0               | 1                  | 0.5                 | 0.57           | 9.85           | 2.57              | 0.98            | 5.03            |
| 7617    | 7617     | 1               | 2                  | 1.5                 | 0.48           | 11.28          | 2.79              | 1.35            | 4.66            |
| 7617    | 7617     | 3               | 4                  | 3.5                 | 0.58           | 10.57          | 3.54              | 1.26            | 4.04            |
| 7617    | 7617     | 6               | 7                  | 6.5                 | 0.56           | 9.60           | 4.30              | 1.37            | 3.68            |
| 7617    | 7617     | 10              | 11                 | 10.5                | 0.88           | 9.88           | 2.97              | 1.28            | 4.17            |
| 7617    | 7617     | 14              | 15                 | 14.5                | 0.80           | 9.67           | 4.15              | 1.44            | 3.51            |
| 7620    | 7620     | 0               | 1                  | 0.5                 | 0.65           | 11.34          | 0.75              | 0.56            | 3.84            |
| 7620    | 7620     | 1               | 2                  | 1.5                 | 0.45           | 10.76          | 1.84              | 1.13            | 3.54            |
| 7620    | 7620     | 3               | 4                  | 3.5                 | 0.43           | 11.81          | 2.55              | 1.21            | 4.13            |
| 7620    | 7620     | 6               | 7                  | 6.5                 | 0.57           | 10.97          | 2.73              | 0.97            | 2.94            |
| 7620    | 7620     | 10              | 11                 | 10.5                | 0.63           | 10.22          | 4.94              | 0.65            | 2.81            |
| 7620    | 7620     | 14              | 15                 | 14.5                | 0.44           | 9.88           | 3.91              | 0.92            | 2.00            |
