# Supplementary material for: Are Iron-Phosphate Minerals a Sink for Phosphorus in Anoxic Black Sea Sediments?
Source: PubMed Central journal article supplement (PMC4079231; doi:10.1371/journal.pone.0101139), 2014-07-02
Supplement: pone.0101139.s004.pdf [file pone.0101139.s004.pdf]

## Dataset S4: Solid phase iron fractions

| Station | Core     | Sediment depth  |                    |                     | Fe-Carb<br>μmol/g | Fe-Ox1<br>μmol/g | Fe-Ox2<br>μmol/g | Fe-Mag<br>μmol/g |
|---------|----------|-----------------|--------------------|---------------------|-------------------|------------------|------------------|------------------|
|         |          | <i>top (cm)</i> | <i>bottom (cm)</i> | <i>average (cm)</i> |                   |                  |                  |                  |
| 10      | MC-10-05 | 2.00            | 3.00               | 2.50                | 14.29             | 24.25            | 16.42            | 13.26            |
| 10      | MC-10-05 | 7.00            | 9.00               | 8.00                | 12.95             | 27.65            | 14.55            | 15.43            |
| 10      | MC-10-05 | 13.00           | 15.00              | 14.00               | 12.14             | 33.27            | 15.41            | 15.11            |
| 10      | MC-10-05 | 21.00           | 24.00              | 22.50               | 7.80              | 30.34            | 13.40            | 13.68            |
| 10      | MC-10-05 | 30.00           | 33.00              | 31.50               | 7.43              | 35.18            | 12.93            | 14.97            |
| 10      | MC-10-05 | 42.00           | 45.00              | 43.50               | 8.32              | 33.58            | 13.43            | 13.77            |
| 8       | MC-08-02 | 1.00            | 2.00               | 1.50                | 10.78             | 20.38            | 10.25            | 8.45             |
| 8       | MC-08-02 | 15.00           | 17.00              | 16.00               | 7.98              | 31.13            | 11.91            | 11.94            |
| 8       | MC-08-02 | 33.00           | 36.00              | 34.50               | 6.00              | 30.85            | 10.12            | 10.30            |
| 5       | MC-05-14 | 0.00            | 1.00               | 0.50                | 6.61              | 13.56            | 13.54            | 5.67             |
| 5       | MC-05-14 | 1.00            | 2.00               | 1.50                | 6.91              | 13.39            | 8.83             | 5.73             |
| 5       | MC-05-14 | 2.00            | 3.00               | 2.50                | 9.04              | 14.66            | 10.75            | 5.57             |
| 5       | MC-05-14 | 3.00            | 4.00               | 3.50                | 6.00              | 13.59            | 7.00             | 6.51             |
| 5       | MC-05-14 | 5.00            | 6.00               | 5.50                | 5.94              | 16.50            | 7.80             | 7.36             |
| 5       | MC-05-14 | 7.00            | 8.00               | 7.50                | 3.96              | 13.85            | 4.75             | 5.45             |
| 5       | MC-05-14 | 10.00           | 11.00              | 10.50               | 5.34              | 11.73            | 6.03             | 5.21             |
| 5       | MC-05-14 | 13.00           | 14.00              | 13.50               | 6.12              | 13.60            | 6.82             | 6.06             |
| 5       | MC-05-14 | 16.00           | 17.00              | 16.50               | 4.93              | 14.71            | 6.19             | 5.81             |
| 5       | MC-05-14 | 19.00           | 20.00              | 19.50               | 4.99              | 12.22            | 7.01             | 5.51             |
| 5       | MC-05-14 | 22.00           | 23.00              | 22.50               | 4.35              | 11.37            | 4.25             | 4.95             |
| 5       | MC-05-14 | 25.00           | 26.00              | 25.50               | 3.87              | 13.12            | 7.33             | 5.61             |
| 5       | MC-05-14 | 26.00           | 27.00              | 26.50               | 6.56              | 38.07            | 16.51            | 23.33            |
| 5       | MC-05-14 | 29.00           | 30.00              | 29.50               | 7.46              | 35.24            | 15.36            | 22.83            |
| 5       | MC-05-14 | 32.00           | 33.00              | 32.50               | 7.52              | 34.33            | 13.16            | 17.00            |
| 5       | MC-05-14 | 33.00           | 34.00              | 33.50               | 7.74              | 31.05            | 13.66            | 14.51            |
| 5       | MC-05-14 | 34.00           | 35.00              | 34.50               | 6.40              | 18.57            | 7.46             | 8.46             |
| 7614    | 7614-1   | 2.00            | 3.00               | 2.50                | 6.51              | 37.84            | 36.20            | 16.29            |
| 7614    | 7614-1   | 4.00            | 5.00               | 4.50                | 1.50              | 11.31            | 14.63            | 9.13             |
| 7614    | 7614-1   | 6.00            | 7.00               | 6.50                | 1.04              | 12.73            | 16.72            | 12.21            |
| 7614    | 7614-1   | 8.00            | 9.00               | 8.50                | 1.19              | 11.14            | 16.61            | 9.79             |
| 7614    | 7614-1   | 10.00           | 11.00              | 10.50               | 0.86              | 12.15            | 19.96            | 13.34            |
| 7614    | 7614-1   | 15.00           | 16.00              | 15.50               | 1.21              | 11.42            | 14.59            | 11.10            |
| 7614    | 7614-1   | 20.00           | 21.00              | 20.50               | 1.13              | 16.00            | 15.79            | 19.01            |
| 7614    | 7614-1   | 24.00           | 25.00              | 24.50               | 0.97              | 8.73             | 10.26            | 9.21             |
| 7617    | 7617     | 2.00            | 3.00               | 2.50                | 3.91              | 16.96            | 11.46            | 12.41            |
| 7617    | 7617     | 4.00            | 5.00               | 4.50                | 4.67              | 21.32            | 11.74            | 16.83            |
| 7617    | 7617     | 6.00            | 7.00               | 6.50                | 5.36              | 19.33            | 11.32            | 15.03            |
| 7617    | 7617     | 8.00            | 9.00               | 8.50                | 4.36              | 20.46            | 11.44            | 13.49            |
| 7617    | 7617     | 10.00           | 11.00              | 10.50               | 3.57              | 13.77            | 7.08             | 8.34             |
| 7617    | 7617     | 15.00           | 16.00              | 15.50               | 6.13              | 25.05            | 12.79            | 15.68            |
| 7617    | 7617     | 20.00           | 21.00              | 20.50               | 3.16              | 20.63            | 10.66            | 12.46            |
| 7617    | 7617     | 25.00           | 26.00              | 25.50               | 5.00              | 17.82            | 9.31             | 11.04            |
| 7617    | 7617     | 30.00           | 31.00              | 30.50               | 5.46              | 23.42            | 10.93            | 13.35            |
| 7617    | 7617     | 34.00           | 35.00              | 34.50               | 6.43              | 18.37            | 8.08             | 9.67             |
| 7620    | 7620     | 2.00            | 3.00               | 2.50                | 4.26              | 15.75            | 7.11             | 6.42             |
| 7620    | 7620     | 4.00            | 5.00               | 4.50                | 4.56              | 16.94            | 6.19             | 6.24             |
| 7620    | 7620     | 6.00            | 7.00               | 6.50                | 3.78              | 14.88            | 5.27             | 6.66             |
| 7620    | 7620     | 8.00            | 9.00               | 8.50                | 3.90              | 17.54            | 6.03             | 7.28             |
| 7620    | 7620     | 10.00           | 11.00              | 10.50               | 2.08              | 6.35             | 2.32             | 1.31             |
| 7620    | 7620     | 15.00           | 16.00              | 15.50               | 2.69              | 12.43            | 3.91             | 4.31             |
| 7620    | 7620     | 20.00           | 21.00              | 20.50               | 3.21              | 10.98            | 3.41             | 4.37             |
| 7620    | 7620     | 25.00           | 26.00              | 25.50               | 5.01              | 16.56            | 5.58             | 9.46             |
| 7620    | 7620     | 30.00           | 31.00              | 30.50               | 4.69              | 26.91            | 9.19             | 15.66            |
